# Supplementary material
Source: PubMed Central journal article supplement (PMC1820498)

Supplemental Fig 1. Log-phase *myc*<sup>+/+</sup> fibroblasts and *myc*<sup>-/-</sup> fibroblasts expressing MycWT, MycΔMBII or vector control were labeled (“pulse”) with <sup>35</sup>S-methionine/cysteine for 0.5, 1.0 and 1.5 hr. Subsequently, cells were washed and incubated in regular growth medium (“chase”) for 6 hr. Cell extracts were prepared and normalized for protein content. Cyclin T1 and CDK9 were immunoprecipitated from cell extracts, resolved on SDS-PAGE and visualized by phospho-imager. Mean quantitation of duplicates from a representative experiment is shown. Error bars show the standard deviation. Upper panels indicate relative label incorporation into Cyclin T1 and CDK9 during “pulse”, lower panels indicate label loss during “chase”

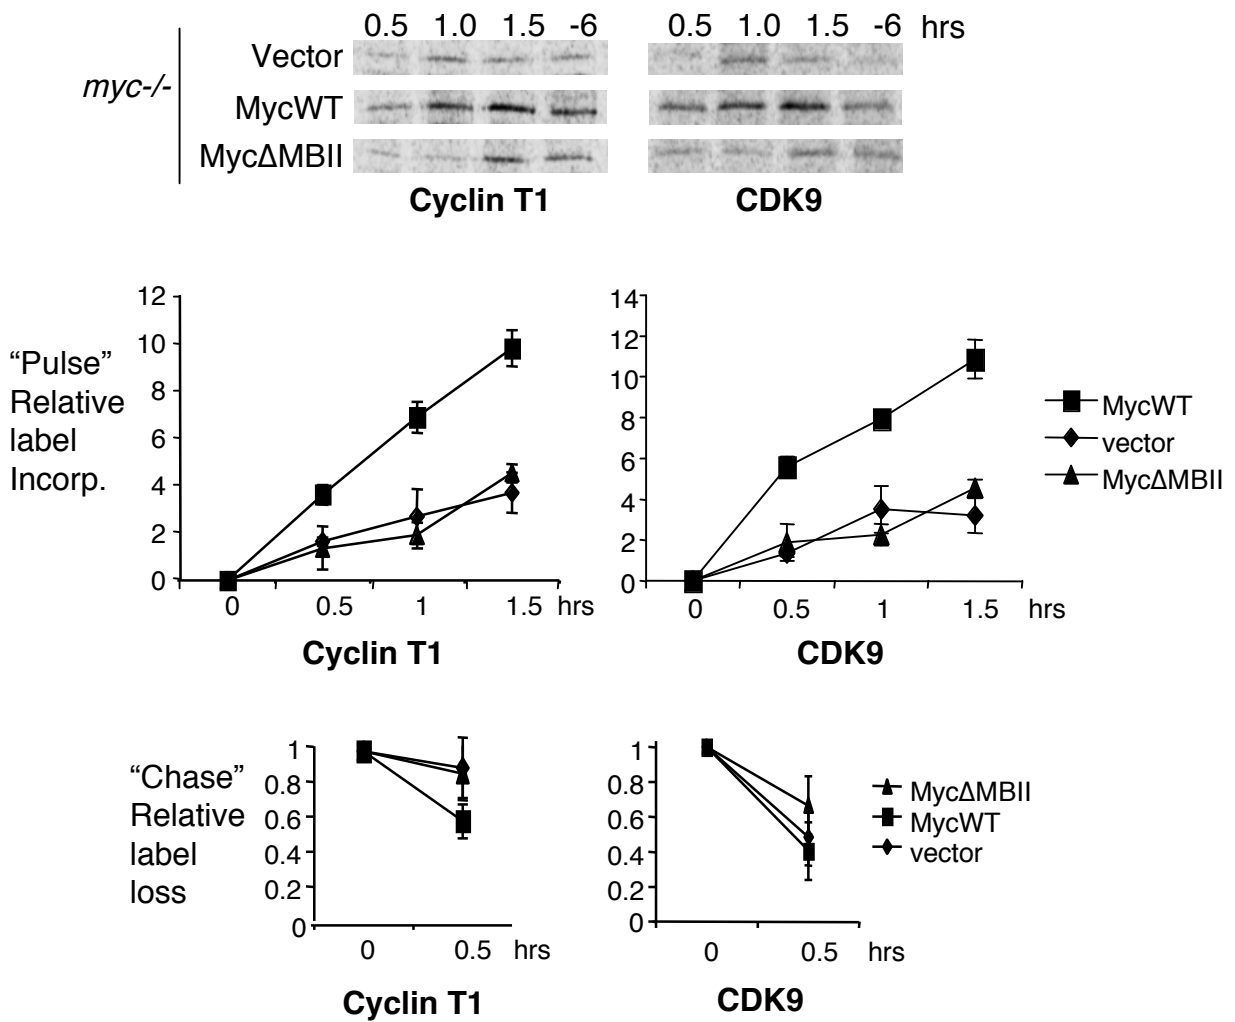

Supplement: molcellb_27_6_2059__1.pdf [file molcellb_27_6_2059__1.pdf]
